# Supplementary material for: Targeted pressure-based development of membrane biofilms improves anaerobic membrane bioreactor effluent quality
Source: Royal Society of Chemistry journal article supplement (doi:10.1039/d2ew00386d), 2022-01-01
Supplement: d2ew00386d1.pdf [file d2ew00386d1.pdf]

## Electronic Supplementary Information

# Targeted pressure-based development of membrane biofilms improves anaerobic membrane bioreactor effluent quality

Christelle Sawaya<sup>a</sup>, Lama Ramadan<sup>a</sup>, Charbel El Khoury<sup>a</sup>, Josephine Al-Alam<sup>a</sup>, Mahmoud Wazne<sup>a</sup>, and Moustapha Harb<sup>a, \*</sup>

<sup>a</sup> Department of Civil and Environmental Engineering, Lebanese American University, 309 Bassil Building, Byblos, Lebanon

\*Corresponding author:  
Moustapha Harb  
305 Bassil Building, Byblos, Lebanon 2038-1401  
Phone: +961-9-547254  
Email: [moustapha.harb@lau.edu.lb](mailto:moustapha.harb@lau.edu.lb)

**Table S1** qPCR assessment details: Primers sequences, thermocycling conditions, and amplicon sizes for all genes targeted.

| Gene                     | Primers (5'-3')                                        | Preincubation  | Amplification                                | Cycles | Amplicon (bp) | Reference                    |
|--------------------------|--------------------------------------------------------|----------------|----------------------------------------------|--------|---------------|------------------------------|
| <i>sul1</i>              | F- CGCACCGGAAACATCGCTGCAC<br>R- TGAAGTTCCGCCGCAAGGCTCG | 95°C for 5 min | 95°C for 30 s, 55 °C for 30 s, 72°C for 60 s | 40     | 163           | (Pei et al., 2006)           |
| <i>sul2</i>              | F- TCCGGTGGAGGCCGGTATCTGG<br>R- CGGGAATGCCATCTGCCTTGAG | 95°C for 5 min | 95°C for 15 s, 56 °C for 30 s, 72°C for 40s  | 40     | 191           | (Pei et al., 2006)           |
| <i>tetC</i>              | F-GCGGGATATCGTCCATTCCG<br>R-GCGTAGAGGATCCACAGGACG      | 95°C for 5 min | 95°C for 30 s, 55 °C for 30 s, 72°C for 60s  | 40     | 207           | (Naas et al., 2011)          |
| <i>tetQ</i>              | F- AGAATCTGCTGTTTGCCAGTG<br>R- CGGAGTGTC AATGATATTGCA  | 95°C for 5 min | 95°C for 30 s, 55 °C for 30 s, 72°C for 60 s | 40     | 124           | (Naas et al., 2011)          |
| <i>ampC</i>              | F- CCTCTTGCTCCACATTTGCT<br>R- ACAACGTTTGCTGTGTGACG     | 95°C for 5 min | 95°C for 45 s, 58 °C for 60 s, 72°C for 60s  | 40     | 189           | (Szczepanowski et al., 2009) |
| <i>bla<sub>TEM</sub></i> | F-TTCCTGTTTTTGCTCACCCAG<br>R-CTCAAGGATCTTACCGCTGTTG    | 95°C for 5 min | 95°C for 45 s, 58 °C for 60 s, 72°C for 60s  | 40     | 445           | (Bibbal et al., 2007)        |
| <i>int1</i>              | F- CTGGATTTGATCACGGCACG<br>R- ACATGCGTGTAATCATCGTCG    | 95°C for 5 min | 95°C for 30 s, 60 °C for 60 s, 72°C for 60s  | 40     | 196           | (Barlow et al., 2004)        |
| <i>rpoB</i>              | F- AACATCGTTTTGATCAAC<br>R- CGTTGCATGTTGGTACCCAT       | 94°C for 5 min | 94°C for 30 s, 50 °C for 90 s, 72°C for 90s  | 40     | 381           | (Dahllöf et al., 2000)       |

## qPCR methods for gene quantification

The standards were prepared on PCR products. The PCR reactions were conducted using 4  $\mu\text{L}$  of 5x FIREPol Master Mix (Solis BioDyne, USA), 1  $\mu\text{L}$  each of forward and reverse primers at 5  $\mu\text{M}$ , 1  $\mu\text{L}$  DNA template, and 13  $\mu\text{L}$  molecular-grade water, in a 20  $\mu\text{L}$  reaction. PCR products were run on a 1.5 % agarose gel and detected on a ChemiDoc Touching Imaging System (Bio-Rad Laboratories, USA). A sterile scalpel was used to excise bands, which were then purified using the GenElute Gel Extraction Kit (Sigma-Aldrich, USA) according to the manufacturer's protocol. Concentrations of gel extracts were quantified using the AccuGreen™ High Sensitivity dsDNA Quantitation Kit (Biotium) with a Qubit 2.0 Fluorometer (Thermo Fisher, USA). Thermocycling conditions for each primer set used in standard preparation are as shown in Table S2, but with the addition of a final elongation step. For qPCR, each reaction consisted of 20  $\mu\text{L}$  using 10  $\mu\text{L}$  of the Biotium Forget-Me-Not qPCR Master Mix, 1  $\mu\text{L}$  of 5  $\mu\text{M}$  each for forward and reverse primers, 1  $\mu\text{L}$  of the template, and 7  $\mu\text{L}$  of molecular-grade water. Standard curves were generated during qPCR using serial dilutions of the prepared standards at  $10^{-2}$  to  $10^{-8}$  of the stock concentration.

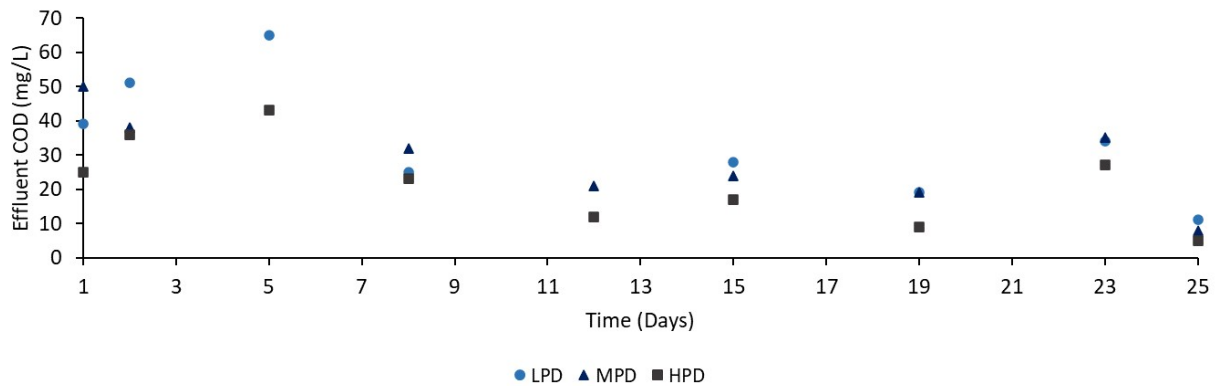

**Figure S1** Effluent COD values over course of the experiment from the LPD, MPD, and HPD membranes. Biofilm development was until Day 17 and the operation stage immediately following.

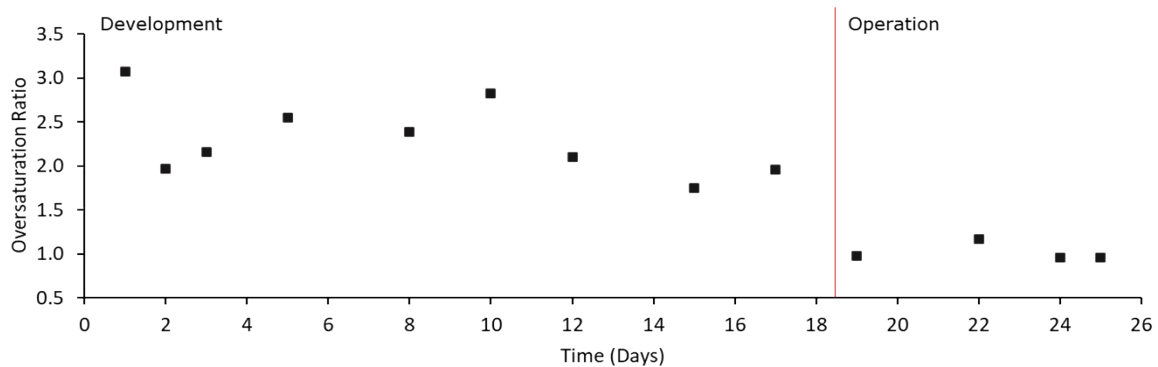

**Figure S2** Oversaturation ratio over course of the experiment from the HPD membrane. Biofilm development was until Day 17 and the operation stage immediately following.

**Table S2** Representative species with the relative abundance (RA) highest on the HPD membrane – tight layer. LPD and HPD represent the low predeveloped and high predeveloped membrane biofilms, respectively. Loose and tight represent the layers of

| Species                                                                                                                                                                    | LPD - Loose | HPD - Loose | LPD - Tight | HPD - Tight |
|----------------------------------------------------------------------------------------------------------------------------------------------------------------------------|-------------|-------------|-------------|-------------|
| <i>Azovibrio restrictus</i> (100%)                                                                                                                                         | 0.96        | 0.50        | 3.94        | 12.96       |
| <i>Acinetobacter dispersus/tandooi/tjernbergiae/haemolyticus/parvus/beijerinckii</i> (100%)                                                                                | 0.24        | 0.22        | 1.39        | 6.91        |
| <i>Diaphorobacter polyhydroxybutyratorans/nitroreducens; Ottowia beijingensis/shaoguanensis/pentelensis; Comamonas faecalis/serinivorans; Brachymonas chironomi</i> (100%) | 1.15        | 1.99        | 2.63        | 4.22        |
| <i>Azospira restricta</i> (97.08%)                                                                                                                                         | 1.09        | 1.62        | 2.88        | 4.85        |
| <i>Pseudomonas resinovorans/guangdongensis</i> (99.6%)<br>or <i>Pseudomonas aeruginosa/otitidis/oryzae/guezennei</i> (99.21 %)                                             | 0.21        | 0.03        | 0.57        | 7.70        |
| <i>Sulfuricurvum kujiense</i> (99.21%)                                                                                                                                     | 0.16        | 0.41        | 2.40        | 5.46        |
| <i>Azospira oryzae</i> (100%)                                                                                                                                              | 0.01        | 0.01        | 1.04        | 1.56        |
| <i>Acidovorax temperans/defluvii</i> (100%)                                                                                                                                | 0.00        | 0.01        | 0.01        | 2.64        |
| <i>Geobacter lovleyi SZ/thiogenes</i> (100%)                                                                                                                               | 0.64        | 0.53        | 1.35        | 1.64        |
| <i>Rectinema cohabitans</i> (94.86 %)                                                                                                                                      | 1.00        | 0.96        | 0.76        | 1.60        |
| <i>Leptolinea tardivitalis</i> (91.67%)                                                                                                                                    | 0.95        | 1.03        | 0.76        | 1.43        |
| <i>Klebsiella / Enterobacter / Salmonella species</i> (1005)                                                                                                               | 0.37        | 0.71        | 0.72        | 1.28        |
| <i>Cloacibacterium normanense/rupense/caeni/rupense</i> (100%)                                                                                                             | 0.00        | 0.00        | 0.23        | 1.35        |
| <i>Psychrobacter sanguinis</i> (100%)                                                                                                                                      | 0.01        | 0.00        | 0.00        | 1.17        |
| <i>Thiobacillus sajanensis</i> (100%)                                                                                                                                      | 0.01        | 0.03        | 0.03        | 0.94        |
| <i>Moraxella osloensis</i> (1005)                                                                                                                                          | 0.00        | 0.01        | 0.00        | 0.63        |
| <i>Aliarcobacter lanthieri/cibarius/cryaerophilus</i> (99.60%)                                                                                                             | 0.00        | 0.00        | 0.00        | 0.56        |
| <i>Propionivibrio limicola</i> (98.81 %)                                                                                                                                   | 0.00        | 0.00        | 0.00        | 0.55        |
| <i>Clostridium oceanicum</i> (91.73%)                                                                                                                                      | 0.08        | 0.11        | 0.13        | 0.55        |
| <i>Desulfovibrio mexicanus</i> (99.60%)                                                                                                                                    | 0.05        | 0.05        | 0.12        | 0.50        |
| <i>Novispirillum itersonii species</i> (100%)                                                                                                                              | 0.00        | 0.00        | 0.00        | 0.48        |
| <i>Ruminiclostridium cellobioparum subsp. termitidis /Acetivibrio alkalicellulosi</i> (92.89%)                                                                             | 0.38        | 0.38        | 0.38        | 0.47        |
| <i>Methanotherix / Methanotherix soehngenii</i> (100%)                                                                                                                     | 0.02        | 0.03        | 0.07        | 0.41        |
| <i>Pseudoscherichia vulneris/shigella species / Escherichia species</i> (100%)                                                                                             | 0.00        | 0.00        | 0.00        | 0.37        |
| <i>Streptococcus minor</i> (99.60%)                                                                                                                                        | 0.00        | 0.01        | 0.00        | 0.36        |
| <i>Phascolarctobacterium faecium</i> (85.04%)                                                                                                                              | 0.05        | 0.05        | 0.03        | 0.32        |
| <i>Syntrophomonas zehnderi OL-4</i> (97.65%)                                                                                                                               | 0.05        | 0.04        | 0.06        | 0.32        |
| <i>Anaerosinus glycerini</i> (100%)                                                                                                                                        | 0.02        | 0.02        | 0.09        | 0.18        |
| <i>Actinobacillus seminis</i> (98.81 %)                                                                                                                                    | 0.00        | 0.00        | 0.00        | 0.28        |
| <i>Moraxella cuniculi</i> (99.60 %)                                                                                                                                        | 0.00        | 0.00        | 0.00        | 0.26        |
| <i>Labilbacter marinus</i> (90.94%)                                                                                                                                        | 0.10        | 0.07        | 0.02        | 0.25        |
| <i>Castellaniella caeni / daejeonensis / defragrans / ginsengisoli</i> (100%)                                                                                              | 0.00        | 0.00        | 0.03        | 0.04        |
| <i>Luteitalea pratensis</i> (82.75 %)                                                                                                                                      | 0.03        | 0.04        | 0.03        | 0.22        |
| <i>Thauera mechernichensis / humireducens</i> (100 %)                                                                                                                      | 0.01        | 0.00        | 0.00        | 0.22        |
| <i>Dialister propionificaciens / Dialister succinatiphilus YIT 11850</i> (98.41 %)                                                                                         | 0.00        | 0.00        | 0.00        | 0.22        |
| <i>Nitratiruptor tergaricus DSM 16512</i> (85.10 %)                                                                                                                        | 0.00        | 0.00        | 0.00        | 0.21        |
| <i>Pelistega suis</i> (98.42 %)                                                                                                                                            | 0.00        | 0.01        | 0.00        | 0.20        |

each membrane biofilm

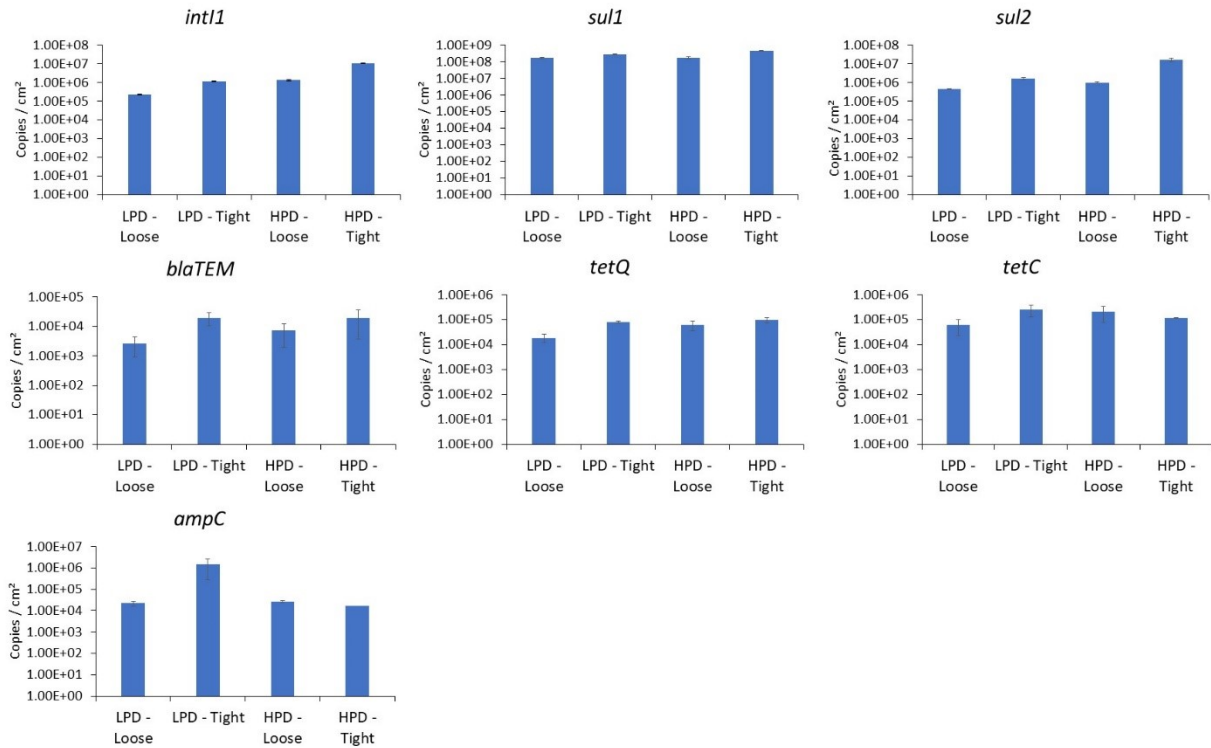

**Figure S3** Antibiotic resistance gene (ARG) and *int11* gene copy abundances detected in the AnMBR samples. LPD and HPD represent the Low and high pre-development membrane biofilm, respectively.

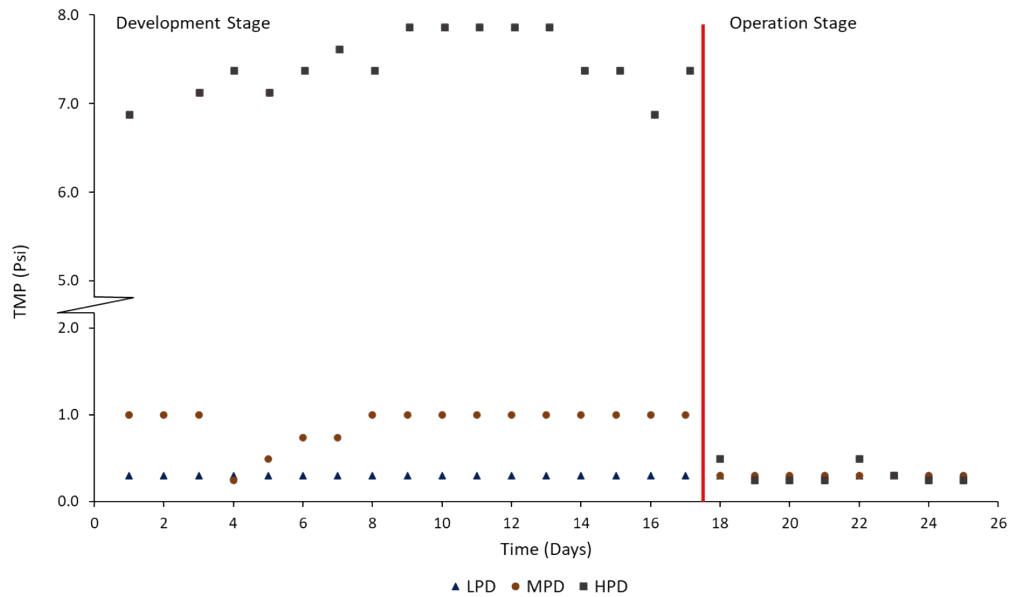

**Figure S4** Transmembrane pressure (TMP) during the development and operation stages of the membrane biofilms in the AnMBR. LPD represents low pressure development, MPD medium pressure development, and HPD high pressure development.

## References

- Barlow, R.S., Pemberton, J.M., Desmarchelier, P.M., Gobius, K.S., 2004. Isolation and characterization of integron-containing bacteria without antibiotic selection. *Antimicrobial agents and chemotherapy* 48, 838-842.
- Bibbal, D., Dupouy, V., Ferré, J.-P., Toutain, P.-L., Fayet, O., Prère, M.-F., Bousquet-Mélou, A., 2007. Impact of three ampicillin dosage regimens on selection of ampicillin resistance in Enterobacteriaceae and excretion of blaTEM genes in swine feces. *Applied and Environmental Microbiology* 73, 4785-4790.
- Dahllöf, I., Baillie, H., Kjelleberg, S., 2000. rpoB-based microbial community analysis avoids limitations inherent in 16S rRNA gene intraspecies heterogeneity. *Applied and environmental microbiology* 66, 3376-3380.
- Naas, T., Ergani, A., Carrère, A., Nordmann, P., 2011. Real-time PCR for detection of NDM-1 carbapenemase genes from spiked stool samples. *Antimicrobial agents and chemotherapy* 55, 4038-4043.
- Pei, R., Kim, S.-C., Carlson, K.H., Pruden, A., 2006. Effect of river landscape on the sediment concentrations of antibiotics and corresponding antibiotic resistance genes (ARG). *Water research* 40, 2427-2435.
- Szczepanowski, R., Linke, B., Krahn, I., Gartemann, K.-H., Gützkow, T., Eichler, W., Pühler, A., Schlüter, A., 2009. Detection of 140 clinically relevant antibiotic-resistance genes in the plasmid metagenome of wastewater treatment plant bacteria showing reduced susceptibility to selected antibiotics. *Microbiology* 155, 2306-2319.
